# Supplementary material for: Effectiveness of a Group Support Lifestyle Modification (GSLiM) Programme among Obese Adults in Workplace: A Randomised Controlled Trial
Source: PubMed Central journal article supplement (PMC4990415; doi:10.1371/journal.pone.0160343), 2016-08-18
Supplement: pone.0160343.s003.pdf [file pone.0160343.s003.pdf]

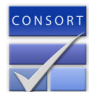

PONE – D- 16-06104; Effectiveness of a Group Support Lifestyle Modification (GSLiM) Programme among Obese Adult in Workplace: A Randomised Controlled Trial  
 CONSORT 2010 checklist of information to include when reporting a randomised trial

| Section/Topic              | Item No | Checklist item                                                                                                                        | Reported on page No             |
|----------------------------|---------|---------------------------------------------------------------------------------------------------------------------------------------|---------------------------------|
| <b>Title and abstract</b>  |         |                                                                                                                                       |                                 |
|                            | 1a      | Identification as a randomised trial in the title                                                                                     | line 1 – 3;<br>page 1           |
|                            | 1b      | Structured summary of trial design, methods, results, and conclusions (for specific guidance see CONSORT for abstracts)               | Page 2                          |
| <b>Introduction</b>        |         |                                                                                                                                       |                                 |
| Background and objectives  | 2a      | Scientific background and explanation of rationale                                                                                    | line 50 – 77;<br>page 4 - 5     |
|                            | 2b      | Specific objectives or hypotheses                                                                                                     | line 80 to 85;<br>page 5        |
| <b>Methods</b>             |         |                                                                                                                                       |                                 |
| Trial design               | 3a      | Description of trial design (such as parallel, factorial) including allocation ratio                                                  | line 87; page 5                 |
|                            | 3b      | Important changes to methods after trial commencement (such as eligibility criteria), with reasons                                    | Nil                             |
| Participants               | 4a      | Eligibility criteria for participants                                                                                                 | line 99 – 103;<br>page 6        |
|                            | 4b      | Settings and locations where the data were collected                                                                                  | line 97 - 98;<br>page 6         |
| Interventions              | 5       | The interventions for each group with sufficient details to allow replication, including how and when they were actually administered | Line 126 – 170;<br>page 11 - 12 |
| Outcomes                   | 6a      | Completely defined pre-specified primary and secondary outcome measures, including how and when they were assessed                    | Line 172 – 220;<br>page 13 -14  |
|                            | 6b      | Any changes to trial outcomes after the trial commenced, with reasons                                                                 | Nil                             |
| Sample size                | 7a      | How sample size was determined                                                                                                        | Line 222- 225;<br>page 14       |
|                            | 7b      | When applicable, explanation of any interim analyses and stopping guidelines                                                          | Nil                             |
| Randomisation:<br>Sequence | 8a      | Method used to generate the random allocation sequence                                                                                | Line 116 - 117;                 |

|                                                      |     |                                                                                                                                                                                             |                              |
|------------------------------------------------------|-----|---------------------------------------------------------------------------------------------------------------------------------------------------------------------------------------------|------------------------------|
| generation                                           | 8b  | Type of randomisation; details of any restriction (such as blocking and block size)                                                                                                         | page 7<br>Line 115;          |
| Allocation concealment mechanism                     | 9   | Mechanism used to implement the random allocation sequence (such as sequentially numbered containers), describing any steps taken to conceal the sequence until interventions were assigned | page 7<br>Line 117 - 118;    |
| Implementation                                       | 10  | Who generated the random allocation sequence, who enrolled participants, and who assigned participants to interventions                                                                     | page 7<br>Line 114,          |
| Blinding                                             | 11a | If done, who was blinded after assignment to interventions (for example, participants, care providers, those assessing outcomes) and how                                                    | page 7<br>Line 117 - 118;    |
|                                                      | 11b | If relevant, description of the similarity of interventions                                                                                                                                 | -                            |
| Statistical methods                                  | 12a | Statistical methods used to compare groups for primary and secondary outcomes                                                                                                               | Line 237 – 238;<br>page 15   |
|                                                      | 12b | Methods for additional analyses, such as subgroup analyses and adjusted analyses                                                                                                            | Line 241 – 243;<br>Page 15   |
| <b>Results</b>                                       |     |                                                                                                                                                                                             |                              |
| Participant flow (a diagram is strongly recommended) | 13a | For each group, the numbers of participants who were randomly assigned, received intended treatment, and were analysed for the primary outcome                                              | Flow diagram                 |
|                                                      | 13b | For each group, losses and exclusions after randomisation, together with reasons                                                                                                            | Flow diagram                 |
| Recruitment                                          | 14a | Dates defining the periods of recruitment and follow-up                                                                                                                                     | Line 94-95;<br>page 6        |
|                                                      | 14b | Why the trial ended or was stopped                                                                                                                                                          | -                            |
| Baseline data                                        | 15  | A table showing baseline demographic and clinical characteristics for each group                                                                                                            | Table 4;<br>Page 17          |
| Numbers analysed                                     | 16  | For each group, number of participants (denominator) included in each analysis and whether the analysis was by original assigned groups                                                     | Table 4;<br>Page 17          |
| Outcomes and estimation                              | 17a | For each primary and secondary outcome, results for each group, and the estimated effect size and its precision (such as 95% confidence interval)                                           | Table 6 -8 ;<br>page 19 - 22 |
|                                                      | 17b | For binary outcomes, presentation of both absolute and relative effect sizes is recommended                                                                                                 | Line 261 – 262 ,<br>page 18; |
| Ancillary analyses                                   | 18  | Results of any other analyses performed, including subgroup analyses and adjusted analyses, distinguishing pre-specified from exploratory                                                   | -                            |
| Harms                                                | 19  | All important harms or unintended effects in each group (for specific guidance see CONSORT for harms)                                                                                       | Line 350- 253;               |

**Discussion**

|                          |    |                                                                                                                  |                                                         |
|--------------------------|----|------------------------------------------------------------------------------------------------------------------|---------------------------------------------------------|
| Limitations              | 20 | Trial limitations, addressing sources of potential bias, imprecision, and, if relevant, multiplicity of analyses | Line 418 – 444;<br>page 28 - 29                         |
| Generalisability         | 21 | Generalisability (external validity, applicability) of the trial findings                                        | Line 415 – 417 ;<br>page 28                             |
| Interpretation           | 22 | Interpretation consistent with results, balancing benefits and harms, and considering other relevant evidence    | Line 370 – 414;<br>Page 24 -25                          |
| <b>Other information</b> |    |                                                                                                                  | Line 88 – 89;                                           |
| Registration             | 23 | Registration number and name of trial registry                                                                   | Page 5                                                  |
| Protocol                 | 24 | Where the full trial protocol can be accessed, if available                                                      | With this<br>submission as<br>additional<br>information |
| Funding                  | 25 | Sources of funding and other support (such as supply of drugs), role of funders                                  | Line 90;<br>Page 5                                      |

---
